# Supplementary material for: Batch Production of Wafer-Scale Monolayer MoS2
Source: MDPI journal article supplement (doi:10.3390/cryst13081275), 2023-08-18
Supplement: s1 [file s1]

# Batch Production of Wafer-Scale Monolayer MoS<sub>2</sub>

Zheng Wei <sup>1</sup>, Xingdong Sun <sup>1</sup>, Yongqing Cai <sup>2,\*</sup>, Yao Liang <sup>1</sup> and Zhihua Zhang <sup>1</sup>

<sup>1</sup> School of Materials Science and Engineering, Dalian Jiaotong University, Dalian 116028, China

<sup>2</sup> Shenzhen Institute for Quantum Science and Engineering, Southern University of Science and Technology, Shenzhen 518055, China

\* Correspondence: caiyq@sustech.edu.cn

## (1) Experimental setup

Batch production of monolayer MoS<sub>2</sub> wafers were grown by CVD and Figure S1 presents the photograph for the experimental setup. The CVD system consists of a three-temperature-zone tube furnace, a vacuum chamber and the gas circuit. Sulfur powder and molybdenum trioxide powder were employed as precursors and were loaded in a quartz boat and an inner quartz tube at low temperature zone I and zone II, respectively. 1-inch wafer-scale sapphire substrates were stuck in the grooves of the tailor-made sample holder erected and were placed in high temperature zone III. Monolayer MoS<sub>2</sub> wafers were produced in batch in this CVD system under proper temperature and flow rates. Actually, batch production of oxygen doped MoS<sub>2</sub> wafers were also synthesized in this system and the growth parameters were adjusted slightly compared with those for intrinsic MoS<sub>2</sub> wafers.

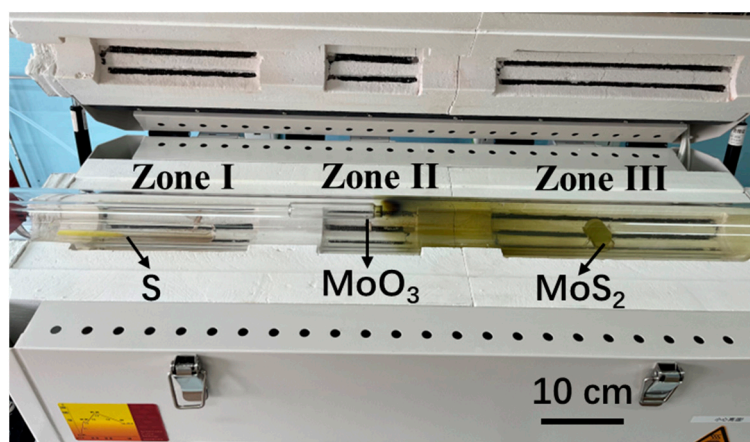

Figure S1. Experimental setup for batch production.

## (2) Optical microscopy images

Optical microscopy images of the four monolayer MoS<sub>2</sub> wafers from one batch are shown in Figure S2 and a-d are images for wafer numbered 1-4, respectively. All of the optical microscopy images exhibit clean surfaces and similar contrasts, indicating the great cleanliness and homogeneity for the wafers in the same batch. Note that the scratches on the surface of samples are made by tweezers artificially for the comparison of MoS<sub>2</sub> monolayers and sapphire substrates.

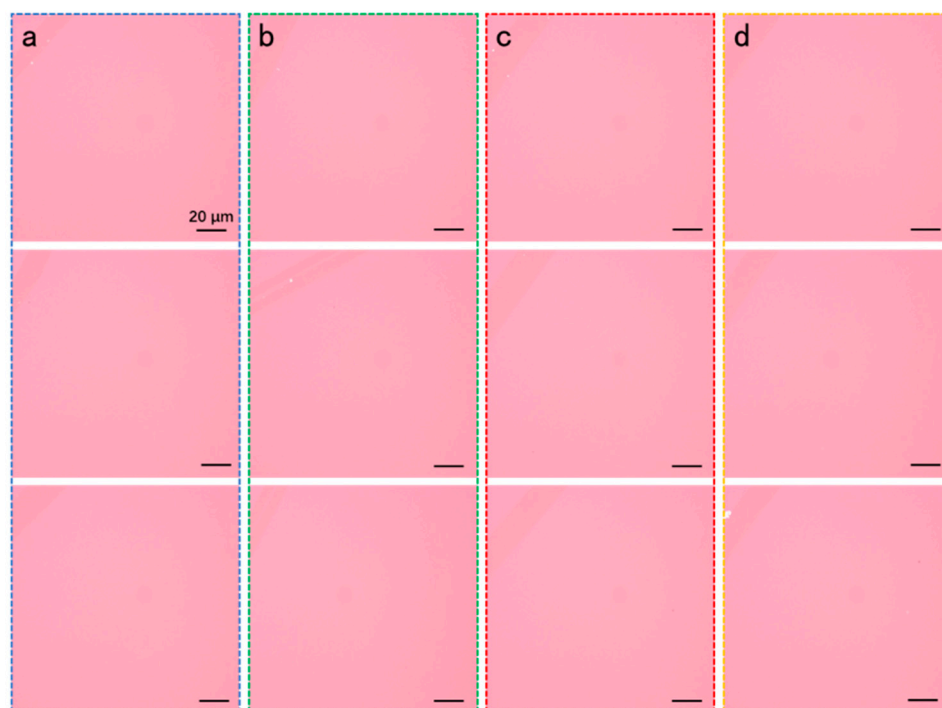

**Figure S2.** Optical microscopy images of MoS<sub>2</sub> monolayers in one batch. (a–d) Optical microscopy images for wafer 1 - wafer 4. Scale bars: 20 μm.

### (3) AFM of sapphire

As depicted in Figure S3, the AFM image demonstrates that the sapphire substrate exhibits smooth morphology with steps on the surface. Through analysis of the AFM image, the roughness of the sapphire substrates is calculated to be 0.2 nm. These substrate steps play a pivotal role in facilitating the nucleation process during the monolayer MoS<sub>2</sub> growth.

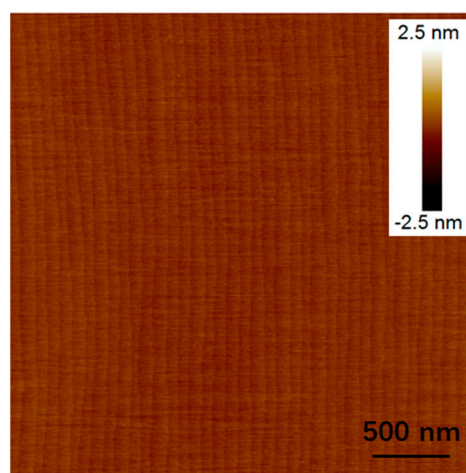

**Figure S3.** AFM image of sapphire substrate. Inset shows the color-scale of height.

### (4) Thickness of MoS<sub>2</sub>

The layer number of MoS<sub>2</sub> samples is characterized by AFM. Figure S4 demonstrates the AFM image of MoS<sub>2</sub> ribbon on sapphire substrate. The measured height at the ribbon's edge is approximately 0.6 nm, consistent with the thickness of a monolayer MoS<sub>2</sub> film.

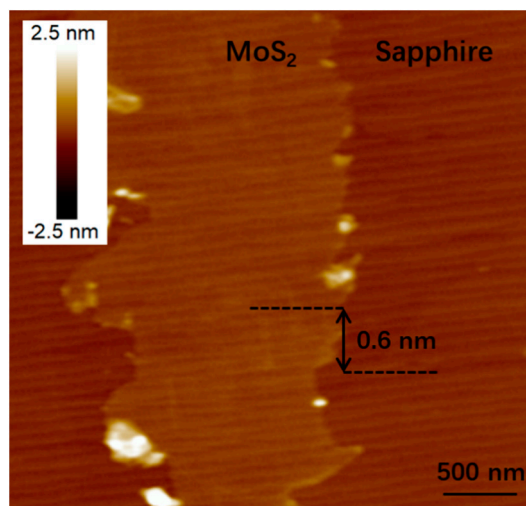

**Figure S4.** AFM image of the MoS<sub>2</sub> ribbon on sapphire substrate. Inset is the color-scale bar.

##### (5) Grain size of monolayer MoS<sub>2</sub>

We have estimated the grain size of MoS<sub>2</sub> monolayer by AFM. In order to figure out the location and shape of grain boundaries, we fumigated the sample with steam. Figure S5 shows the AFM image of the MoS<sub>2</sub> sample with clear grain boundaries and the grain size of MoS<sub>2</sub> is measured around 1  $\mu$ m.

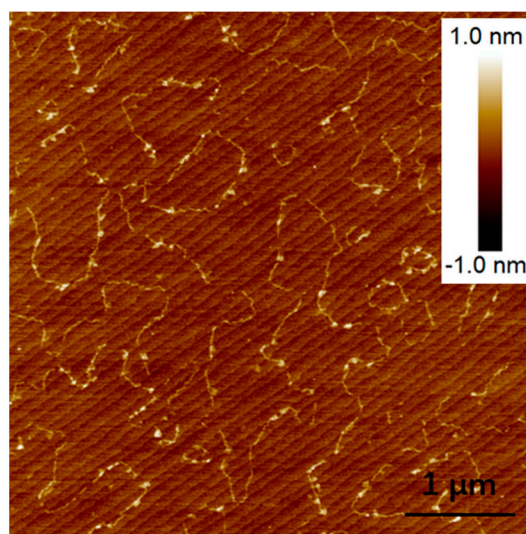

**Figure S5.** Estimate of the crystal grain size of MoS<sub>2</sub> by AFM image. Inset shows the color-scale of height.

##### (6) Raman spectra

To investigate the homogeneity of the batch-produced MoS<sub>2</sub> monolayers across the entire wafer scale, we conducted optical spectroscopy. The normalized raw data of the Raman spectra for MoS<sub>2</sub> monolayers along the X-direction and Y-direction are presented in Figure S6a and S6b, respectively. The spectra show typical E<sub>2g</sub> and A<sub>1g</sub> Raman peaks and all of the Raman peaks exhibit coincident peak position and uniform intensity in both directions, indicating the excellent homogeneity of the entire monolayer MoS<sub>2</sub> wafers along both orientations.

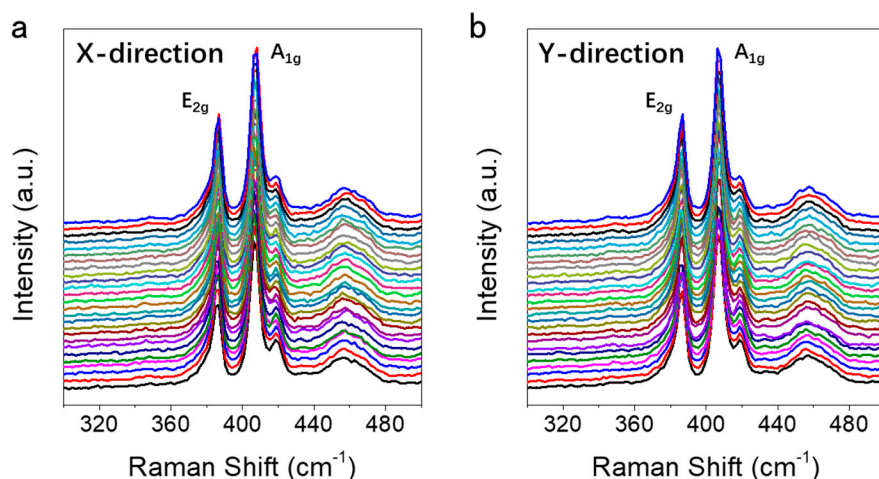

**Figure S6.** Raman spectra of MoS<sub>2</sub>. (a,b) Raman spectra of wafer-scale monolayer MoS<sub>2</sub> along X- and Y-direction, respectively.

### (7) PL spectra

Similar to the Raman spectra, we also performed PL spectra of the batch-produced MoS<sub>2</sub> monolayers across the entire wafer scale. Figure S7a and S7b are the normalized raw data of the PL spectra for MoS<sub>2</sub> monolayers along the X-direction and Y-direction. The strong PL peaks are clearly observed and show constant wavelength and intensity for the spectra in both directions, which indicate the great uniformity of monolayer MoS<sub>2</sub> wafers grown by batch production as well.

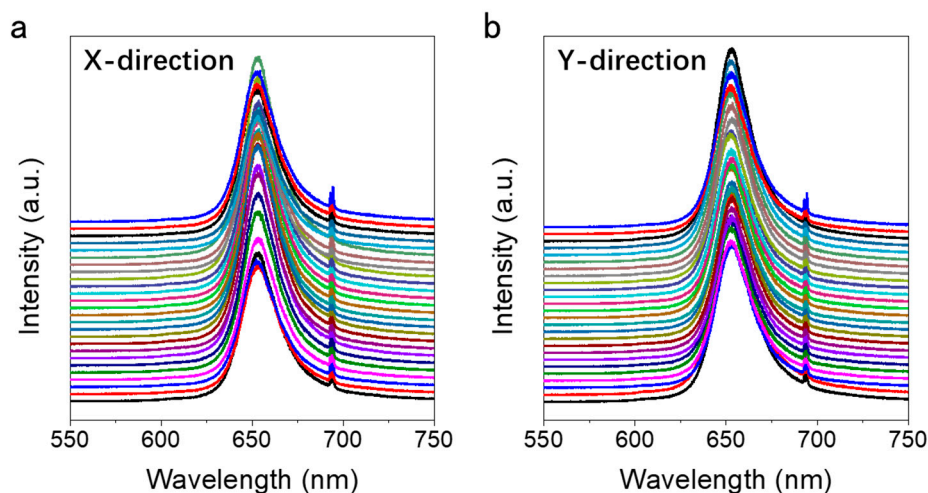

**Figure S7.** PL spectra of MoS<sub>2</sub>. (a,b) PL spectra of wafer-scale monolayer MoS<sub>2</sub> along X- and Y-direction, respectively.

### (8) Transfer characteristic curves

Back-gate FETs were fabricated on SiO<sub>2</sub>/Si substrates to characterize the electrical performance of MoS<sub>2</sub> monolayers grown through batch production. Figure S8 presents the transfer characteristic curves of 20 transistors and the curves exhibit typical n-type semiconductor behavior. Field-effect mobility and current on/off ratio of these MoS<sub>2</sub> transistors are calculated and the average value of mobility and on/off ratio are 10.5 cm<sup>2</sup>V<sup>-1</sup>s<sup>-1</sup> and 1.3×10<sup>6</sup>, respectively. The results of electrical performances confirm the high quality of monolayer MoS<sub>2</sub> produced by batch production process and the distributions of transfer curves, field-effect mobility and current on/off ratio indicate the outstanding homogeneity of MoS<sub>2</sub> samples.

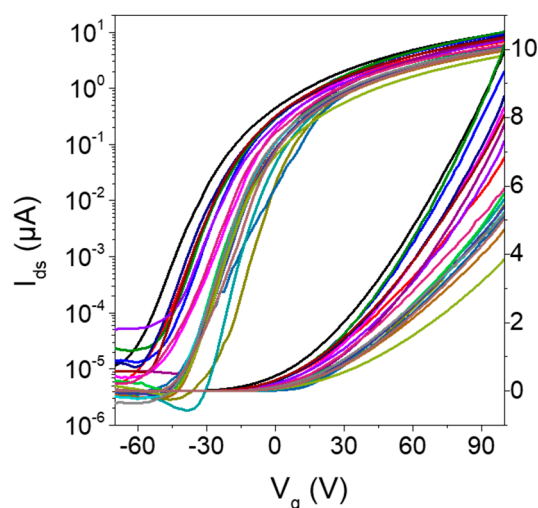

**Figure S8.** Transfer characteristic curves of MoS<sub>2</sub> FETs.

### (9) Comparison of FET performance

In order to compare the performance of MoS<sub>2</sub> FET with previous reported results, especially the MoS<sub>2</sub> samples grown by chemical vapor deposition, we have meticulously compiled a comprehensive summary in Table S1. In this work, the average mobility of the MoS<sub>2</sub> FETs is calculated to be 10.5 cm<sup>2</sup>V<sup>-1</sup>s<sup>-1</sup> and the on/off ratio averages at 1.3 × 10<sup>6</sup>, which is at a high level among the previous results. The results of electrical performance of FETs confirms the high quality of the monolayer MoS<sub>2</sub> films synthesized by batch production.

**Table S1.** Comparison of performance for MoS<sub>2</sub> FET.

| Ref.                | Field-Effect Mobility (cm <sup>2</sup> V <sup>-1</sup> s <sup>-1</sup> ) | On/Off Ratio          |
|---------------------|--------------------------------------------------------------------------|-----------------------|
| Liu, L et al. [1]   | 3.2                                                                      | 1 × 10 <sup>6</sup>   |
| Liu, K et al. [2]   | 6                                                                        | 1 × 10 <sup>6</sup>   |
| Zhang, J et al. [3] | 7                                                                        | 5 × 10 <sup>6</sup>   |
| Yang, P et al. [4]  | 11.2                                                                     | 7.7 × 10 <sup>5</sup> |
| This work           | 10.5                                                                     | 1.3 × 10 <sup>6</sup> |

### (10) Comparison of MoS<sub>2</sub> and MoS<sub>2-x</sub>O<sub>x</sub>

For purpose of comparing the contrast of intrinsic MoS<sub>2</sub> and oxygen doped MoS<sub>2</sub>, photograph of original sapphire, MoS<sub>2</sub> and MoS<sub>2-x</sub>O<sub>x</sub> wafers is shown in Figure S9. The MoS<sub>2</sub> wafer show the color of olive green, while the color of MoS<sub>2-x</sub>O<sub>x</sub> wafer is yellowish brown. Although the samples present different contrasts, they show clean and homogeneous surfaces across the whole wafer, indicating the high quality of the batch-production samples.



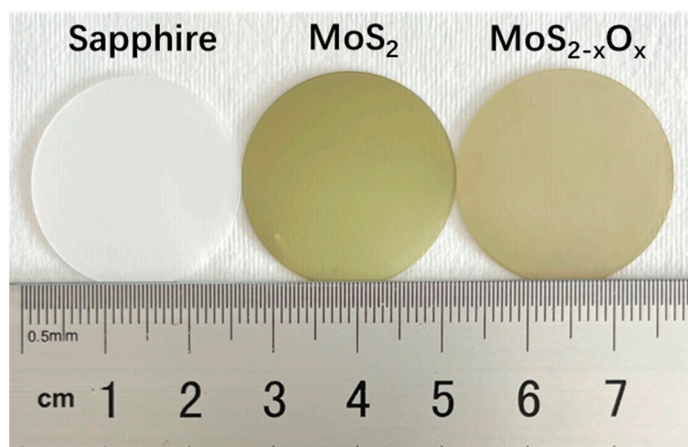

**Figure S9.** Comparison of monolayer MoS<sub>2</sub> wafer and monolayer MoS<sub>2-x</sub>O<sub>x</sub> wafer.

### (11) Grain size of monolayer oxygen-doped MoS<sub>2</sub>

The grain size of oxygen-doped MoS<sub>2</sub> was estimated by optical microscopy image through measuring single-crystal samples. Figure S10 shows the optical microscopy image of oxygen doped MoS<sub>2</sub> grain and it exhibits the grain size of around 35  $\mu\text{m}$ .

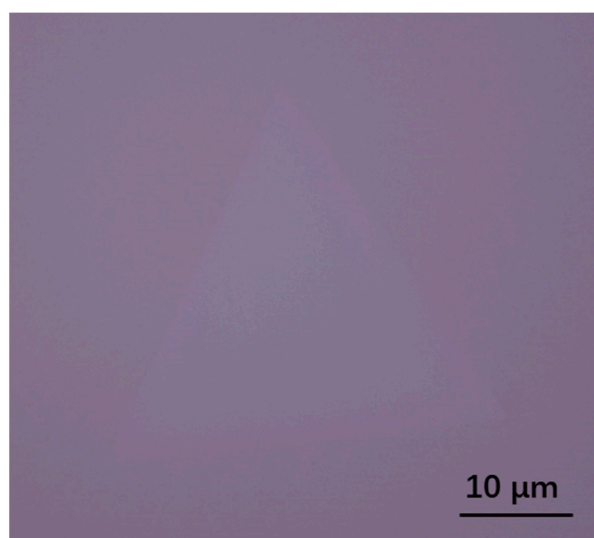

**Figure S10.** Estimate of the crystal grain size of MoS<sub>2</sub> by optical microscopy image.

### References

1. Liu, L.; Qiu, H.; Wang, J.; Xu, G.; Jiao, L. Atomic MoS<sub>2</sub> monolayers synthesized from a metal-organic complex by chemical vapor deposition. *Nanoscale* **2016**, *8*, 4486–4490.
2. Liu, K. K.; Zhang, W.; Lee, Y. H.; Lin, Y. C.; Chang, M. T.; Su, C. Y.; Chang, C. S.; Li, H.; Shi, Y.; Zhang, H. *et al.* Growth of large-area and highly crystalline MoS<sub>2</sub> thin layers on insulating substrates. *Nano Lett* **2012**, *12*, 1538–1544.
3. Zhang, J.; Yu, H.; Chen, W.; Tian, X. Z.; Liu, D. H.; Cheng, M.; Xie, G. B.; Yang, W.; Yang, R.; Bai, X. D. *et al.* Scalable growth of high-quality polycrystalline MoS<sub>2</sub> monolayers on SiO<sub>2</sub> with tunable grain sizes. *ACS Nano* **2014**, *8*, 6024–6030.
4. Yang, P.; Zhang, S.; Pan, S.; Tang, B.; Liang, Y.; Zhao, X.; Zhang, Z.; Shi, J.; Huan, Y.; Shi, Y. *et al.* Epitaxial growth of centimeter-scale single-crystal MoS<sub>2</sub> monolayer on Au(111). *ACS Nano* **2020**, *14*, 5036–5045.
